# Supplementary material for: Interplay of ADHD Polygenic Liability With Birth-Related, Somatic, and Psychosocial Factors in ADHD: A Nationwide Study
Source: Atypon-hosted journal article supplement (doi:10.1176/appi.ajp.21111105), 2022-09-07
Supplement: appi.ajp.21111105.ds001.pdf [file appi.ajp.21111105.ds001.pdf]

## Contents

|                                                                                                                                                                                                                                                                                                            |    |
|------------------------------------------------------------------------------------------------------------------------------------------------------------------------------------------------------------------------------------------------------------------------------------------------------------|----|
| Methods: Targeted literature review of ADHD associated birth-related, somatic and psychosocial risk-factors .....                                                                                                                                                                                          | 2  |
| Table S1. International classification of disease (ICD) and Anatomical Therapeutic Chemical (ATC) codes and definitions of included ADHD risk-factors.....                                                                                                                                                 | 3  |
| Table S2. Associations of ADHD-PRS with evaluated risk-factors in the iPSYCH2012 subcohort (N=21,578), expressed as odds ratios (OR) with 95% confidence intervals (CIs) .....                                                                                                                             | 6  |
| Table S3. Interaction between each putative risk-factor and ADHD-PRS on ADHD case-controls status in 13,697 individuals with ADHD and 21,290 non-ADHD population controls from the iPSYCH case-cohort, showing the differential (linear) effect of PRS per SD across levels of risk factors for ADHD ..... | 9  |
| Figure S1. Flowchart of study population selection.....                                                                                                                                                                                                                                                    | 12 |
| Figure S2. Associations of ADHD-PRS (A) and parental psychiatric history (B) with ADHD case-control status, expressed as incidence rate ratios (IRRs) with 95% confidence intervals (CIs) .....                                                                                                            | 13 |

## **Methods: Targeted literature review of ADHD associated birth-related, somatic and psychosocial risk-factors**

To identify birth-related, somatic and psychosocial factors associated with ADHD and to put our research in context, we conducted a non-systematic, targeted review of the current phenotypic, familial and common genetic variant literature of birth-related, somatic and psychosocial factors linked to ADHD. We searched PubMed until May 2021 to identify the most recent meta-analyses, umbrella reviews, systematic reviews and consensus statements of ADHD risk-factors and correlates and snowballed from these. Based on this review, we kept risk-factor showing phenotypic and/or familial associations in  $\geq 2$  independent samples. We then selected 24 risk-factors that were available in Danish national registers with sufficient coverage. For example, we did not include risk-factors with limited follow-up time in the registers (e.g., smoking during pregnancy which is only available from 1997 onwards) or where the N exposed was low to report according to Danmark Statistics regulations (e.g. certain rare somatic diseases in the mother or the index person). For phenotypic and familial associations, we preferentially present pooled (and when available, adjusted) risk-estimates from the largest available meta-analysis, followed by evidence from published systematic reviews. If such estimates were not available, we present estimates from large-scale population studies, prioritized based on sample size and the inclusion of clinically diagnosed cases. For gene-environment correlation and interactions, we present results of the largest available genetic correlation analyses based on linkage disequilibrium score regression (LDSC) (PMID: 25642630) and summarize the available ADHD-PRS literature, guided by a recently published systematic review (PMID: 33548493). We did not identify any genome-wide by environment interaction studies on ADHD to include in the review. To limit the scope of our targeted literature review, we did not include twin studies or molecular genetic studies using other methods than LDSC or PRS. Results of the literature review are presented in Table 1 in the main text.

**TABLE S1. International classification of disease (ICD) and Anatomical Therapeutic Chemical (ATC) codes and definitions of included ADHD risk-factors**

| Domain         | Risk-factor                              | ICD-codes /ATC-codes                                                                                                                                                                                                                                                                                                                                                                                                                                                                                                                                                                                                                                           | Definition                                                                                                                                          | Reference         |
|----------------|------------------------------------------|----------------------------------------------------------------------------------------------------------------------------------------------------------------------------------------------------------------------------------------------------------------------------------------------------------------------------------------------------------------------------------------------------------------------------------------------------------------------------------------------------------------------------------------------------------------------------------------------------------------------------------------------------------------|-----------------------------------------------------------------------------------------------------------------------------------------------------|-------------------|
|                | Birth weight (BW)                        | n/a                                                                                                                                                                                                                                                                                                                                                                                                                                                                                                                                                                                                                                                            | Low BW <2500 g<br>Average BW 2500–3999 g (ref)<br>High BW ≥ 4000 g                                                                                  | PMID:<br>25726514 |
|                | Small for gestational age (SGA)          | n/a                                                                                                                                                                                                                                                                                                                                                                                                                                                                                                                                                                                                                                                            | SGA defined as being in the 10 <sup>th</sup> percentile of the birthweight distribution in the iPSYCH2012 subcohort, within each birth year and sex | PMID:<br>23026073 |
|                | Apgar score at 5 minutes                 | n/a                                                                                                                                                                                                                                                                                                                                                                                                                                                                                                                                                                                                                                                            | 10 (ref), < 10                                                                                                                                      | PMID:<br>25726514 |
| <b>Somatic</b> | Maternal hypertension during pregnancy   | <b>ICD-8:</b> 637.00, 637.03, 637.09,637.99, 637.04, 637.19, 762.19, 762.29, 762.39<br><b>ICD-10:</b> O13, O14.0, O14.1, O14.2, O14.9, O16, O15.0–15.9                                                                                                                                                                                                                                                                                                                                                                                                                                                                                                         | ≥1 discharge diagnoses 20 weeks after gestation until birth of index child                                                                          | PMID:<br>30785920 |
|                | Maternal infection during pregnancy      | <b>ICD-8:</b> 038, 070, 000-009, 540, 680-686, 050-057, 110, 111, 035, 460-486, 580, 590, 59500, 59501, 612, 620, 622, 381-382, 04000-04399, 013, 320, 322, 392, 474, 04509-04699, 32300, 07199, 07202, 07501, 07929, 09049, 05201, 05302, 05403, 05501, 05601, 03609, 02701, 06209-06599, 09490-09499<br><b>ICD-10:</b> A40, A41, B15-B19, A00-A09, K35, L00-L08, B00-B09, A46, J00-J18, N00, N10, N300, N390, N518B, N70, N71, N72, N76, N770D, N771B, N771L, H65-67, I02, G00-G07, A17, A80-89, B003, B004, B010, B011, B020, B021, B050, B051, B060, B261, B262, B375, B451, B582, B602, A022C, A548A, A548D, A521A, A521B, A229C, A321, A504, A390, E236A | ≥1 discharge diagnoses within 40 weeks prior to birth of index child                                                                                | PMID:<br>30446204 |
|                | Maternal and paternal autoimmune disease | <b>ICD-8:</b> 242, 245.03, 249, 255.10, 255.11, 255.12, 255.18, 255.19,269, 281.00, 281.01, 281.08, 281.09, 283.90, 283.91, 446.49, 340, 354, 364, 446.29, 563.01, 563.19, 571.9, 571.93, 694, 696.09, 696.10, 696.19, 704, 709.01, 712.19, 712.39, 712.59 712.09, 716,                                                                                                                                                                                                                                                                                                                                                                                        | ≥1 discharge diagnoses by child's 5 <sup>th</sup> birthday                                                                                          | PMID:<br>28219489 |

|                                                       |                                                                                                                                                                                                                                                                                                                                               |                                                                                                                                                                                                                    |                                                                                               |
|-------------------------------------------------------|-----------------------------------------------------------------------------------------------------------------------------------------------------------------------------------------------------------------------------------------------------------------------------------------------------------------------------------------------|--------------------------------------------------------------------------------------------------------------------------------------------------------------------------------------------------------------------|-----------------------------------------------------------------------------------------------|
|                                                       | 446.30, 446.31, 446.39, 733.09, 734.00, 734.01, 734.02, 734.08, 734.09, 734.19, 734.9, 712.49<br><b>ICD-10:</b> E05.0, E06.3, E10, E27.1, K90.0, D51.0, D59.1, D69.3, G35, G61.0, H20, M31.3, K50, K51, K74.3, K73, L12, L10, L40 (except L40.4), L63, L80.9, M05, M06, M08, M33, M31.5, M31.6, M35.3, G70.0, M34, M32.1, M32.9, M35.0, M45.9 |                                                                                                                                                                                                                    |                                                                                               |
| Infections                                            | See maternal infection during pregnancy                                                                                                                                                                                                                                                                                                       | Time-varying, first and 5 <sup>th</sup> discharge diagnoses                                                                                                                                                        | PMID:<br>30446204                                                                             |
| Asthma                                                | <b>ICD-8:</b> 493<br><b>ICD-10:</b> J45.0, J45.1, J45.8, J45.9, J46.0, J46.9<br><b>ATC:</b> R03BA01-R03BA08, R03DC01-R03DC04, R03DC03, R03DB04, R03DA54, R03BB01, R03DX05                                                                                                                                                                     | Time-varying, first discharge diagnoses and/or ≥1 prescriptions filled within a year and/or ≥1 prescription of D11Ah, S01GX or V01A, and/or ≥2 prescriptions of D07, R01AD01-R01AD60, or R06A filled within a year | PMID:<br>25828267<br>PMID:<br>28632331                                                        |
| Atopic disease (atopic dermatitis, allergic rhinitis) | <b>ICD-8:</b> 691, 507, 502.00<br><b>ICD-10:</b> L20, L308C, J30, J31.0<br><b>ATC:</b> ≥1 prescription of D11AH, S01GX, V01A<br>≥2 prescriptions of D07, R01AD01 – R01AD60, R06A                                                                                                                                                              | Time-varying, first discharge diagnosis                                                                                                                                                                            | PMID:<br>25828267<br>PMID:<br>28632331                                                        |
| Type 1 diabetes                                       | <b>ICD-8:</b> 250.00–250.09 diagnosed before age 18<br><b>ICD-10:</b> E10 diagnosed before age 18                                                                                                                                                                                                                                             | Time-varying, first discharge diagnosis                                                                                                                                                                            | PMID:<br>33824142                                                                             |
| Epilepsy                                              | <b>ICD-8:</b> 345 (excluding 345.29)<br><b>ICD-10:</b> G40                                                                                                                                                                                                                                                                                    | Time-varying, first discharge diagnosis                                                                                                                                                                            | PMID:<br>27412639                                                                             |
| Traumatic brain injury (TBI)                          | <b>ICD-8:</b> 850, <b>ICD-10,</b> S06.0 ( <b>Mild TBI</b> )<br><b>ICD-8:</b> 800-804, 851-854 ( <b>Moderate/severe TBI</b> )<br><b>ICD-10:</b> S02.0-1, S02.3, S02.7-9, S06.1-9, S07.0-S07.1, S07.8-S07.9, S09.0, S09.7-9, S18, T02.0, T04.0, T06.0, T90.2, T90.5, T90.8-9 ( <b>Moderate/severe TBI</b> )                                     | Time-varying, first discharge diagnosis                                                                                                                                                                            | PMID:<br>28301451<br><br>PMID:<br>27552147                                                    |
| <b>Psychosocial</b>                                   | Maternal and paternal income                                                                                                                                                                                                                                                                                                                  | n/a                                                                                                                                                                                                                | Defined by quintiles in the subcohort at index child's year of birth<br><br>PMID:<br>26249301 |

|                                                   |                                   |                                                                                                                                         |                |
|---------------------------------------------------|-----------------------------------|-----------------------------------------------------------------------------------------------------------------------------------------|----------------|
| Maternal and paternal education                   | n/a                               | Highest completed level of education at index child's year of birth (elementary school, high school, or academic degree)                | PMID: 26249301 |
| Maternal and paternal employment                  | n/a                               | Defined as outside of the workforce, including retirement and currently in education or employed in index child's birth year            | PMID: 26249301 |
| Living in a single parent household               | n/a                               | Evaluated in the first five years of life (no years=reference category)                                                                 | PMID: 27355346 |
| Maternal and paternal age at birth of index child | n/a                               | Maternal age: <20, 20-24, 25-29 (ref), 30-34, ≥35 years-of-age<br>Paternal age: <20, 20-24, 25-29, 30-34 (ref), 35-39, ≥40 years-of-age | PMID: 24452535 |
| Parental psychiatric history                      | ICD-8: 290-315<br>ICD-10: F00-F99 | ≥1 discharge diagnoses for any psychiatric disorder in mother, father, or both by index child's 5 <sup>th</sup> birthday                | PMID: 27355346 |

**Note:** Diagnoses in the Danish National Patient Register (DNPR) and the Danish Psychiatric Central Research Register (DPCRR) are recorded according to the International classification of disease (ICD) version 8 between 1977 and 1993 and ICD-10 from 1994 onwards. ICD-9 was never implemented in Denmark. The Danish National Prescription Registry (DPR) includes information on all prescriptions redeemed at Danish pharmacies since 1995 coded according to the Anatomical Therapeutic Chemical (ATC) classification system.

**Abbreviations:** Na, not applicable. Ref, reference category in statistical analyses.

**TABLE S2. Associations of ADHD-PRS with evaluated risk-factors in the iPSYCH2012 subcohort (N=21,578), expressed as odds ratios (OR) with 95% confidence intervals (CIs)**

| Domain        | Risk factor                                                      | Level       | N     | OR per PRS  |             |             | $p_{adj}$       |
|---------------|------------------------------------------------------------------|-------------|-------|-------------|-------------|-------------|-----------------|
|               |                                                                  |             |       | SD          | LCI         | LCI         |                 |
| Birth-related | Birth weight                                                     | <2500 g     | 698   | 1.02        | 0.95        | 1.10        |                 |
|               |                                                                  | 2500-3999 g | 16865 | Ref         |             |             |                 |
|               |                                                                  | ≥ 4000 g    | 3932  | 0.99        | 0.95        | 1.02        | 1.00            |
|               | Small for gestational age                                        | No          | 19564 | Ref         |             |             |                 |
|               |                                                                  | Yes         | 1931  | <b>1.08</b> | <b>1.03</b> | <b>1.13</b> | <b>&lt;.05</b>  |
|               | Apgar score at 5 minutes                                         | 10          | 19892 | Ref         |             |             |                 |
| <10           |                                                                  | 1487        | 1.01  | 0.95        | 1.06        | 1.00        |                 |
| Somatic       | Maternal hypertensive disorders during pregnancy                 | No          | 21264 | Ref         |             |             |                 |
|               |                                                                  | Yes         | 314   | 1.01        | 0.90        | 1.12        | 1.00            |
|               | Maternal infection during pregnancy                              | No          | 20952 | Ref         |             |             |                 |
|               |                                                                  | Yes         | 626   | 1.06        | 0.98        | 1.15        | 1.00            |
|               | Maternal autoimmune disorder by child's 5 <sup>th</sup> birthday | No          | 21012 | Ref         |             |             |                 |
|               |                                                                  | Yes         | 566   | <b>1.14</b> | <b>1.04</b> | <b>1.24</b> | <b>&lt;.05</b>  |
|               | Paternal autoimmune disorder by child's 5 <sup>th</sup> birthday | No          | 21193 | Ref         |             |             |                 |
|               |                                                                  | Yes         | 385   | 0.98        | 0.88        | 1.08        | 1.00            |
|               | 1 infection                                                      | No          | 13245 | Ref         |             |             |                 |
|               |                                                                  | Yes         | 8333  | <b>1.07</b> | <b>1.05</b> | <b>1.10</b> | <b>&lt;.001</b> |
|               | ≥ 5 infections                                                   | No          | 20989 | Ref         |             |             |                 |
|               |                                                                  | Yes         | 589   | <b>1.14</b> | <b>1.05</b> | <b>1.24</b> | <b>&lt;.05</b>  |
|               | Asthma                                                           | No          | 18688 | Ref         |             |             |                 |
|               |                                                                  | Yes         | 2890  | 1.04        | 1.00        | 1.08        | 0.56            |
|               | Atopic diseases                                                  | No          | 19814 | Ref         |             |             |                 |
|               |                                                                  | Yes         | 1764  | 0.97        | 0.93        | 1.02        | 0.88            |
|               | Type 1 diabetes                                                  | No          | 21486 | Ref         |             |             |                 |
|               |                                                                  | Yes         | 92    | 0.89        | 0.72        | 1.09        | 0.90            |
| Epilepsy      | No                                                               | 21137       | Ref   |             |             |             |                 |
|               | Yes                                                              | 441         | 0.99  | 0.90        | 1.09        | 1.00        |                 |

|                       |                                                                         |                 |             |             |             |                 |                 |
|-----------------------|-------------------------------------------------------------------------|-----------------|-------------|-------------|-------------|-----------------|-----------------|
| Psychosocial          | Traumatic brain injury                                                  | No              | 19780       | Ref         |             |                 |                 |
|                       |                                                                         | Mild            | 1558        | <b>1.11</b> | <b>1.05</b> | <b>1.17</b>     |                 |
|                       |                                                                         | Severe          | 339         | 1.09        | 0.98        | 1.21            | <b>&lt;.01</b>  |
|                       | Maternal income at birth                                                | 1st quintile    | 4302        | <b>1.19</b> | <b>1.14</b> | <b>1.24</b>     |                 |
|                       |                                                                         | 2nd quintile    | 4318        | <b>1.19</b> | <b>1.14</b> | <b>1.24</b>     |                 |
|                       |                                                                         | 3rd quintile    | 4315        | <b>1.10</b> | <b>1.05</b> | <b>1.15</b>     |                 |
|                       |                                                                         | 4th quintile    | 4317        | <b>1.04</b> | <b>1.00</b> | <b>1.09</b>     |                 |
|                       |                                                                         | 5th quintile    | 4326        | Ref         |             |                 | <b>&lt;.001</b> |
|                       | Paternal income at birth                                                | 1st quintile    | 4277        | <b>1.19</b> | <b>1.14</b> | <b>1.24</b>     |                 |
|                       |                                                                         | 2nd quintile    | 4293        | <b>1.14</b> | <b>1.10</b> | <b>1.19</b>     |                 |
|                       |                                                                         | 3rd quintile    | 4294        | <b>1.09</b> | <b>1.04</b> | <b>1.13</b>     |                 |
|                       |                                                                         | 4th quintile    | 4293        | <b>1.04</b> | <b>1.00</b> | <b>1.09</b>     |                 |
|                       |                                                                         | 5th quintile    | 4302        | Ref         |             |                 | <b>&lt;.001</b> |
|                       | Maternal education at birth                                             | Elementary      | 6022        | <b>1.16</b> | <b>1.12</b> | <b>1.20</b>     |                 |
|                       |                                                                         | High school     | 9409        | Ref         |             |                 |                 |
|                       |                                                                         | Academic degree | 5914        | <b>0.89</b> | <b>0.86</b> | <b>0.92</b>     |                 |
|                       | Paternal education at birth                                             | Elementary      | 5001        | <b>1.17</b> | <b>1.13</b> | <b>1.21</b>     | <b>&lt;.001</b> |
|                       |                                                                         | High school     | 10926       | Ref         |             |                 |                 |
|                       |                                                                         | Academic degree | 5002        | <b>0.89</b> | <b>0.86</b> | <b>0.92</b>     |                 |
|                       | Maternal employment at birth                                            | In              | 21472       | Ref         |             |                 |                 |
|                       |                                                                         | Out of          | 99          | 1.22        | 1.01        | 1.49            | 0.52            |
|                       | Paternal employment at birth                                            | In              | 21313       | Ref         |             |                 |                 |
|                       |                                                                         | Out of          | 97          | 1.11        | 0.91        | 1.36            | 1.00            |
|                       | Living in a single parent household by child's 5 <sup>th</sup> birthday | No              | 17384       | Ref         |             |                 |                 |
|                       |                                                                         | 1 year          | 1240        | <b>1.14</b> | <b>1.07</b> | <b>1.20</b>     |                 |
|                       |                                                                         | 2 years         | 895         | <b>1.21</b> | <b>1.13</b> | <b>1.30</b>     |                 |
|                       | 3 years                                                                 | 793             | <b>1.28</b> | <b>1.19</b> | <b>1.38</b> |                 |                 |
|                       | 4 years                                                                 | 616             | <b>1.30</b> | <b>1.20</b> | <b>1.41</b> |                 |                 |
|                       | 5 years                                                                 | 650             | <b>1.26</b> | <b>1.16</b> | <b>1.36</b> | <b>&lt;.001</b> |                 |
| Maternal age at birth | <20                                                                     | 412             | <b>1.29</b> | <b>1.17</b> | <b>1.42</b> |                 |                 |
|                       | 20-24                                                                   | 3912            | <b>1.15</b> | <b>1.11</b> | <b>1.20</b> |                 |                 |

|                                                                              |              |       |             |             |             |                 |
|------------------------------------------------------------------------------|--------------|-------|-------------|-------------|-------------|-----------------|
|                                                                              | 25-29        | 8543  | Ref         |             |             |                 |
|                                                                              | 30-34        | 6283  | 0.97        | 0.94        | 1.01        |                 |
|                                                                              | ≥35          | 2410  | <b>0.95</b> | <b>0.90</b> | <b>0.99</b> | <b>&lt;.001</b> |
| Paternal age at birth                                                        | <20          | 112   | <b>1.25</b> | <b>1.04</b> | <b>1.50</b> |                 |
|                                                                              | 20-24        | 1972  | <b>1.22</b> | <b>1.16</b> | <b>1.28</b> |                 |
|                                                                              | 25-29        | 6880  | <b>1.04</b> | <b>1.01</b> | <b>1.08</b> |                 |
|                                                                              | 30-34        | 7380  | Ref         |             |             |                 |
|                                                                              | 35-39        | 3630  | 1.00        | 0.96        | 1.04        |                 |
|                                                                              | ≥40          | 1511  | 0.96        | 0.91        | 1.01        | <b>&lt;.001</b> |
| Parental history of psychiatric disorder by child's 5 <sup>th</sup> birthday | No           | 20281 | Ref         |             |             |                 |
|                                                                              | One parent   | 1211  | <b>1.13</b> | <b>1.07</b> | <b>1.20</b> |                 |
|                                                                              | Both parents | 86    | <b>1.30</b> | <b>1.05</b> | <b>1.61</b> | <b>&lt;.001</b> |

**Note:** Odds ratios and 95% CI reflect the increase in risk of exposure by one per standard deviation increase in the ADHD-PRS.  $p_{adj}$  represents false discovery rate corrected p-values derived using the Benjamini–Hochberg method. Significant associations ( $p < .05$ ) after FDR correction are highlighted in bold.

**Abbreviations:** OR, odds ratio. LCI, lower 95% confidence interval. UCI, upper 95% confidence interval.



**TABLE S3. Interaction between each putative risk-factor and ADHD-PRS on ADHD case-controls status in 13,697 individuals with ADHD and 21,290 non-ADHD population controls from the iPSYCH case-cohort, showing the differential (linear) effect of PRS per SD across levels of risk factors for ADHD**

| Domain        | Risk factor                                                      | Level       | IRR  | LCI  |      | Interaction      |                |
|---------------|------------------------------------------------------------------|-------------|------|------|------|------------------|----------------|
|               |                                                                  |             |      | LCI  | LCI  | p-value          | $p_{adj}$      |
| Birth-related | Birth weight                                                     | <2500 g     | 1.77 | 1.55 | 2.03 |                  |                |
|               |                                                                  | 2500-3999 g | 1.54 | 1.49 | 1.58 |                  |                |
|               |                                                                  | ≥ 4000 g    | 1.49 | 1.41 | 1.58 | 0.07             | 0.86           |
|               | Small for gestational age                                        | No          | 1.54 | 1.50 | 1.58 |                  |                |
|               |                                                                  | Yes         | 1.53 | 1.41 | 1.65 | 0.86             | 0.86           |
|               | Apgar score at 5 minutes                                         | 10          | 1.54 | 1.50 | 1.58 |                  |                |
| <10           |                                                                  | 1.46        | 1.34 | 1.59 | 0.24 | 0.86             |                |
| Somatic       | Maternal hypertensive disorders during pregnancy                 | No          | 1.54 | 1.50 | 1.57 |                  |                |
|               |                                                                  | Yes         | 1.60 | 1.28 | 1.98 | 0.73             | 0.86           |
|               | Maternal infection during pregnancy                              | No          | 1.53 | 1.50 | 1.57 |                  |                |
|               |                                                                  | Yes         | 1.50 | 1.32 | 1.70 | 0.71             | 0.86           |
|               | Maternal autoimmune disorder by child's 5 <sup>th</sup> birthday | No          | 1.55 | 1.51 | 1.59 |                  |                |
|               |                                                                  | Yes         | 1.19 | 1.05 | 1.35 | <b>&lt;.0001</b> | <b>&lt;.01</b> |
|               | Paternal autoimmune disorder by child's 5 <sup>th</sup> birthday | No          | 1.53 | 1.49 | 1.57 |                  |                |
|               |                                                                  | Yes         | 1.77 | 1.47 | 2.15 | 0.13             | 0.86           |
|               | 1 infection                                                      | No          | 1.55 | 1.50 | 1.60 |                  |                |
|               |                                                                  | Yes         | 1.49 | 1.43 | 1.55 | 0.12             | 0.86           |
|               | ≥ 5 infections                                                   | No          | 1.53 | 1.50 | 1.57 |                  |                |
|               |                                                                  | Yes         | 1.49 | 1.30 | 1.70 | 0.66             | 0.86           |
|               | Asthma                                                           | No          | 1.54 | 1.50 | 1.58 |                  |                |
|               |                                                                  | Yes         | 1.48 | 1.39 | 1.58 | 0.24             | 0.86           |
|               | Atopic diseases                                                  | No          | 1.54 | 1.50 | 1.58 |                  |                |
|               |                                                                  | Yes         | 1.51 | 1.30 | 1.65 | 0.72             | 0.86           |
|               | Type 1 diabetes                                                  | No          | 1.53 | 1.50 | 1.57 |                  |                |
|               |                                                                  | Yes         | 2.08 | 1.42 | 3.06 | 0.12             | 0.86           |
| Epilepsy      | No                                                               | 1.54        | 1.50 | 1.58 |      |                  |                |

|                                                                  |                             |                 |      |      |                |                |      |
|------------------------------------------------------------------|-----------------------------|-----------------|------|------|----------------|----------------|------|
| Psychosocial                                                     | Traumatic brain injury      | Yes             | 1.42 | 1.22 | 1.66           | 0.32           | 0.86 |
|                                                                  |                             | No              | 1.54 | 1.50 | 1.59           |                |      |
|                                                                  |                             | Mild            | 1.36 | 1.26 | 1.48           |                |      |
|                                                                  |                             | Severe          | 1.64 | 1.35 | 1.99           | <b>&lt;.01</b> | 0.26 |
|                                                                  | Maternal income at birth    | 1st quintile    | 1.48 | 1.41 | 1.56           |                |      |
|                                                                  |                             | 2nd quintile    | 1.48 | 1.40 | 1.55           |                |      |
|                                                                  |                             | 3rd quintile    | 1.54 | 1.45 | 1.63           |                |      |
|                                                                  |                             | 4th quintile    | 1.57 | 1.48 | 1.67           |                |      |
|                                                                  |                             | 5th quintile    | 1.49 | 1.39 | 1.59           | 0.50           | 0.86 |
|                                                                  | Paternal income at birth    | 1st quintile    | 1.52 | 1.45 | 1.60           |                |      |
|                                                                  |                             | 2nd quintile    | 1.42 | 1.35 | 1.50           |                |      |
|                                                                  |                             | 3rd quintile    | 1.50 | 1.42 | 1.59           |                |      |
|                                                                  |                             | 4th quintile    | 1.59 | 1.50 | 1.68           |                |      |
|                                                                  |                             | 5th quintile    | 1.56 | 1.46 | 1.67           | 0.07           | 0.86 |
|                                                                  | Maternal education at birth | Elementary      | 1.46 | 1.40 | 1.52           |                |      |
|                                                                  |                             | High school     | 1.53 | 1.47 | 1.59           |                |      |
|                                                                  |                             | Academic degree | 1.41 | 1.34 | 1.49           | 0.06           | 0.86 |
|                                                                  | Paternal education at birth | Elementary      | 1.46 | 1.40 | 1.53           |                |      |
|                                                                  |                             | High school     | 1.50 | 1.45 | 1.55           |                |      |
|                                                                  |                             | Academic degree | 1.48 | 1.38 | 1.58           | 0.67           | 0.86 |
| Maternal employment at birth                                     | In                          | 1.54            | 1.50 | 1.58 |                |                |      |
|                                                                  | Out of                      | 1.32            | 0.95 | 1.85 | 0.38           | 0.86           |      |
| Paternal employment at birth                                     | In                          | 1.53            | 1.50 | 1.57 |                |                |      |
|                                                                  | Out of                      | 2.44            | 1.75 | 3.39 | <b>&lt;.01</b> | 0.14           |      |
| Living in a single parent household the first five years of life | No                          | 1.53            | 1.48 | 1.58 |                |                |      |
|                                                                  | 1 year                      | 1.45            | 1.32 | 1.59 |                |                |      |
|                                                                  | 2 years                     | 1.40            | 1.26 | 1.56 |                |                |      |
|                                                                  | 3 years                     | 1.41            | 1.26 | 1.57 |                |                |      |
|                                                                  | 4 years                     | 1.35            | 1.21 | 1.51 |                |                |      |

|                                                                              |              |      |      |      |                |      |
|------------------------------------------------------------------------------|--------------|------|------|------|----------------|------|
|                                                                              | 5 years      | 1.37 | 1.22 | 1.54 | 0.06           | 0.86 |
| Maternal age at birth                                                        | <20          | 1.54 | 1.32 | 1.79 |                |      |
|                                                                              | 20-24        | 1.43 | 1.35 | 1.51 |                |      |
|                                                                              | 25-29        | 1.53 | 1.47 | 1.59 |                |      |
|                                                                              | 30-34        | 1.50 | 1.43 | 1.58 |                |      |
|                                                                              | ≥35          | 1.60 | 1.48 | 1.74 | 0.15           | 0.84 |
| Paternal age at birth                                                        | <20          | 1.75 | 1.30 | 2.36 |                |      |
|                                                                              | 20-24        | 1.38 | 1.28 | 1.48 |                |      |
|                                                                              | 25-29        | 1.52 | 1.45 | 1.59 |                |      |
|                                                                              | 30-34        | 1.53 | 1.46 | 1.60 |                |      |
|                                                                              | 35-39        | 1.54 | 1.44 | 1.64 |                |      |
|                                                                              | ≥40          | 1.67 | 1.51 | 1.86 | <b>&lt;.05</b> | 0.86 |
| Parental history of psychiatric disorder by child's 5 <sup>th</sup> birthday | No           | 1.54 | 1.50 | 1.58 |                |      |
|                                                                              | One parent   | 1.44 | 1.31 | 1.57 |                |      |
|                                                                              | Both parents | 1.74 | 1.18 | 2.57 | 0.30           | 0.86 |

**Note:** Incidence rate ratios and 95% confidence intervals reflect the differential linear effect of ADHD-PRS on ADHD case-control status across levels of each risk-factor.  $p_{adj}$  represents false discovery rate corrected p-values derived using the Benjamini–Hochberg method. Significant interactions ( $p<.05$ ) before and after FDR correction are highlighted in bold.

**Abbreviations:** IRR, incidence rate ratio. LCI, lower 95% confidence interval. UCI, upper 95% confidence interval.

**FIGURE S1. Flowchart of study population selection**

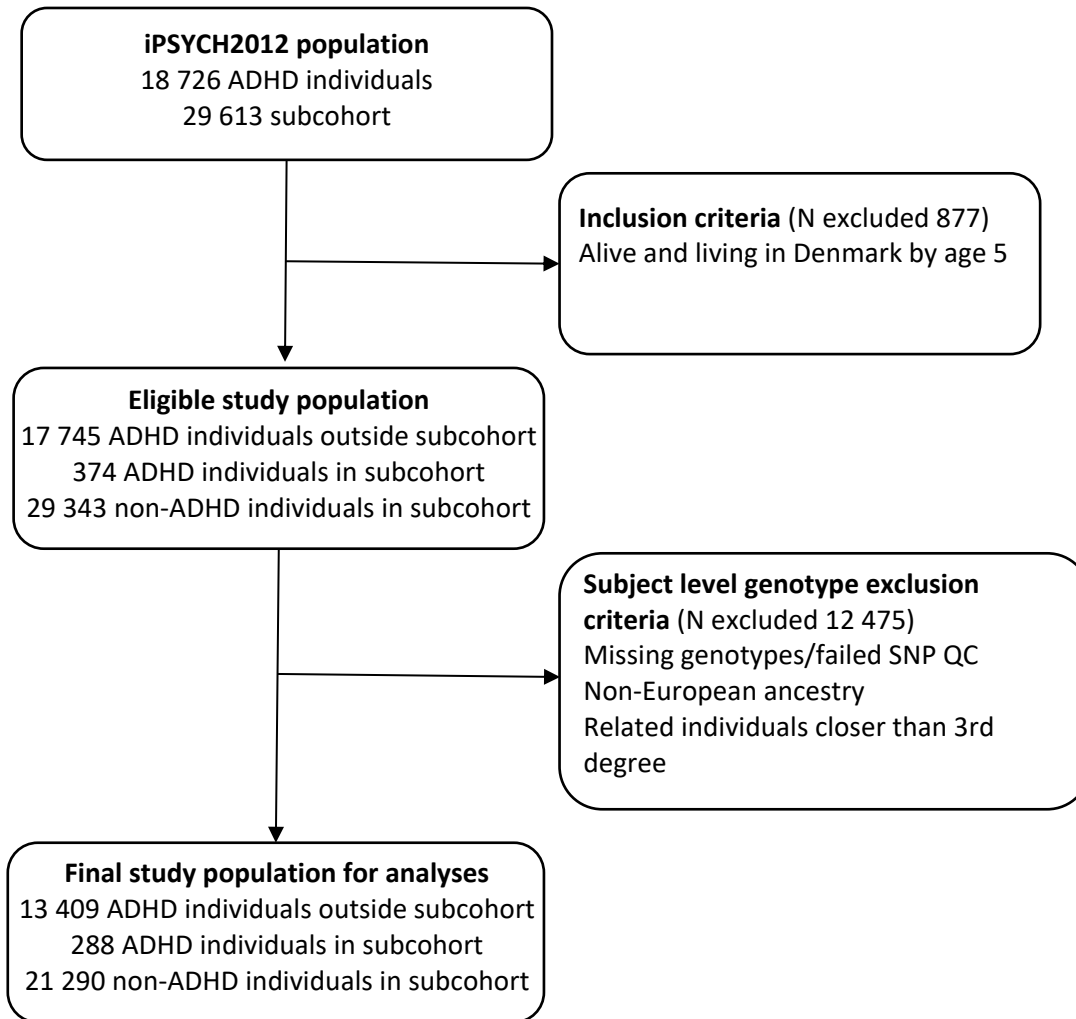

**FIGURE S2. Associations of ADHD-PRS (A) and parental psychiatric history (B) with ADHD case-control status, expressed as incidence rate ratios (IRRs) with 95% confidence intervals (CIs)**

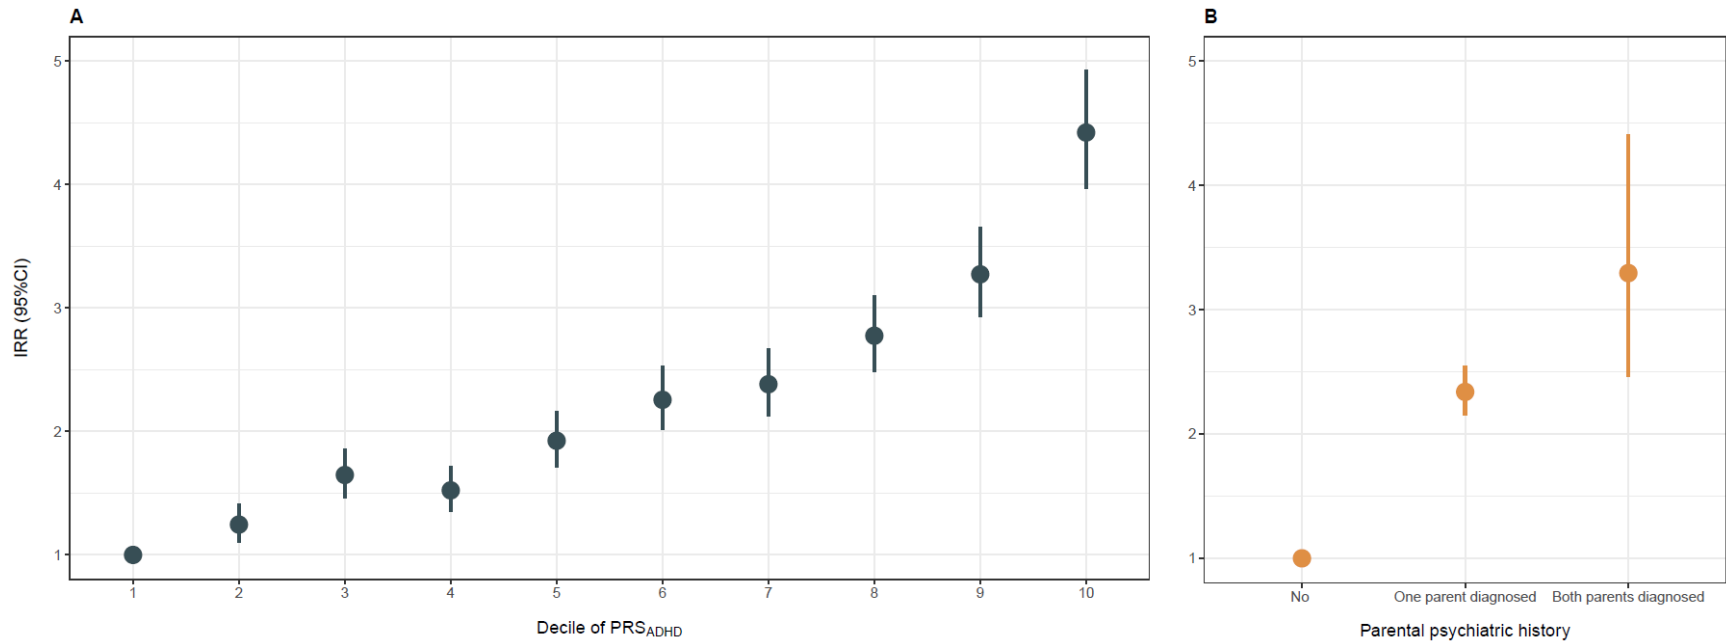

**Note:** Incidence ratio ratios and 95% confidence intervals reflect the increase in risk of ADHD by A) deciles of the ADHD-PRS, and B) parental history of any clinically diagnosed psychiatric disorder.

**Abbreviations:** IRR, incidence rate ratio. LCI, lower 95% confidence interval. UCI, upper 95% confidence interval. PRS, polygenic risk score.
